# Supplementary material for: Knockdown of CYP19A1 in Buffalo Follicular Granulosa Cells Results in Increased Progesterone Secretion and Promotes Cell Proliferation
Source: Front Vet Sci. 2020 Sep 25;7:539496. doi: 10.3389/fvets.2020.539496 (PMC7545956; doi:10.3389/fvets.2020.539496)
Supplement: Supplementary file 1 [file Table_1.XLSX]

## Sheet: Sheet1
Supplementary Table S1. Primers of qRT-PCR.
Gene	Primers	Sequence length (bp)	Tm (℃)	Gene bank ID
CCND1	GAAGTGCGAGGAAGAGGTCT	230	59	XM_025268991.1
	GTTTGTTCACCAGGACCAGC
CCNE1	TACAGCCTGTGAAAACCCCT	241	59	XM_025268991.1
	TTTAGGCTGCAGAAGAGGGT
CCNB1	AGAGGGTGATGTTGAGCTACA	162	59	GU810383.1
	TGCTGTAGAGTTGGTGTCCA
CDK2	GATCTTTCGGACCCTGGGAA	193	59	XM_006075064.2
	CTTGGCTGAAATCCGCTTGT
CDKN1A	CAGGGACGCGCATCAAATC	159	60	XM_006050408.2
	GGCGTCTCGGTAACAAAGTC
CDKN1B	AAGAATCACAAGCCCCTGGA	201	59	XM_006075661.2
	GACCAAATGCGTGTCCTCTG
BCL-2	TTGAGTTCGGAGGGGTCATG	204	59	XM_006064567.2
	CCTTCAGAGACAGCCAGGAG
TP53	TAACCTTCTGTCCTCCGAGC	207	59	NM_001290844.2
	TTGCCAGGGTAGGTCTTCTG
XIAP	TGTGTACCTGCAGACATCGA	167	59	XM_006065005.2
	TGACAACTAAAGCACCGCAC
CASPASE6	CACGTGGACAGCAAGAACAT	206	59	GBEX01000589.1
	GCACAAGTACCACGTCTGTC
HSD17B1	ATATTGGTGACCGGGAGCAT	146	59	XM_006055742.2
	CATTCGATGAGGCTCACGTG
HSD17B7	CCTTCTTTGGGGTGCCTAGT	158	59	XM_025287453.1
	GCTTTGCTCATGTTCCTGCA
CYP17A1	TGACAAAGGCACAGACGTTG	217	59	XM_027529144.1
	CCGGGACATGAAGAGGAAGA
CYP19A1	TGGTGACCATCTGTGCTGAT	211	59	KC020137.1
	TTGAGAAGGAGAGCTTGCCA
GAPDH	ATGCTGGTGCTGAGTATGTG	293	59	EU195062.1
	CTTCTGGGTGGCAGTGAT
